# Supplementary material for: Parental satisfaction with paediatric care with and without the support of an eHealth device: a quasi-experimental study in Sweden
Source: Springer Nature journal article supplement (doi:10.1186/s12913-023-10398-7), 2024-01-09
Supplement: MOESM1 [file 26610286]

**Research project: eHealth as an aid for facilitating and supporting self-management in families with long-term childhood illness**

**Parent**

**Age:** \_\_\_\_\_

**Gender**

- Male
- Female

**Marital status**

- Cohabiting
- Married
- Single parent
- Divorced/separated
- Widower/widow

**Educational level**

- Compulsory education
- Vocational education
- High school
- University

**Occupation:** \_\_\_\_\_

**Born in Sweden**

- Yes
- No
