# Supplementary material for: Parental satisfaction with paediatric care with and without the support of an eHealth device: a quasi-experimental study in Sweden
Source: Springer Nature journal article supplement (doi:10.1186/s12913-023-10398-7), 2024-01-09
Supplement: MOESM2 [file 26610286]

**Research project: eHealth as an aid for facilitating and supporting self-management in families with long-term childhood illness**

**Parents perception of satisfaction and safety regarding communication with staff via e-tablet**

Please tick the option that best describes your perception of how communication via the e-tablet worked.

**What did you think about the access you had to communicate with the health care professionals via the tablet?**

|                                   |                              |                                               |                               |                                    |
|-----------------------------------|------------------------------|-----------------------------------------------|-------------------------------|------------------------------------|
| <input type="checkbox"/> Very bad | <input type="checkbox"/> Bad | <input type="checkbox"/> Neither good nor bad | <input type="checkbox"/> Good | <input type="checkbox"/> Very good |
|-----------------------------------|------------------------------|-----------------------------------------------|-------------------------------|------------------------------------|

**How satisfied were you with the communication via the tablet from home?**

|                                            |                                       |                                                             |                                    |                                         |
|--------------------------------------------|---------------------------------------|-------------------------------------------------------------|------------------------------------|-----------------------------------------|
| <input type="checkbox"/> Very dissatisfied | <input type="checkbox"/> Dissatisfied | <input type="checkbox"/> Neither satisfied nor dissatisfied | <input type="checkbox"/> Satisfied | <input type="checkbox"/> Very satisfied |
|--------------------------------------------|---------------------------------------|-------------------------------------------------------------|------------------------------------|-----------------------------------------|

**How safe did you feel communicating with the health care professionals via the tablet from home?**

|                                      |                                 |                                                  |                               |                                    |
|--------------------------------------|---------------------------------|--------------------------------------------------|-------------------------------|------------------------------------|
| <input type="checkbox"/> Very unsafe | <input type="checkbox"/> Unsafe | <input type="checkbox"/> Neither safe nor unsafe | <input type="checkbox"/> Safe | <input type="checkbox"/> Very safe |
|--------------------------------------|---------------------------------|--------------------------------------------------|-------------------------------|------------------------------------|
